# Supplementary material for: Genome-Wide Histone Acetylation Underlies Tumor Intrinsic Immune Signaling Induced by Photothermal Therapy in Ovarian Cancer
Source: Research Square preprint supplement (doi:10.21203/rs.3.rs-9144148/v1), 2026-04-15

A2780\_HEY\_HH23\_TykNu\_10mins\_H3K9ac\_actin\_20250525

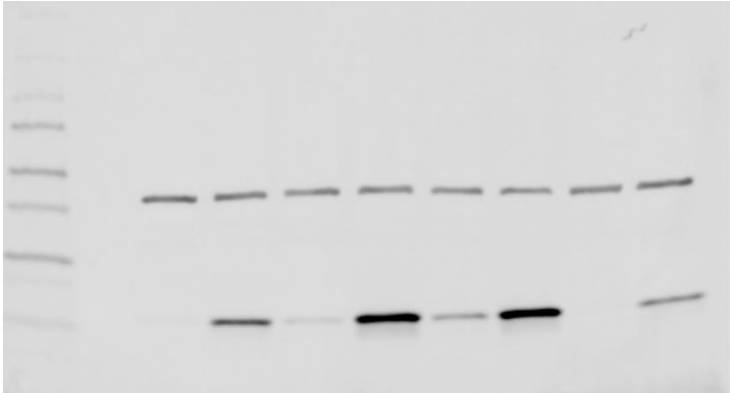

A2780\_HEY\_HH23\_TykNu\_10mins\_H3 for H3K9ac\_actin\_20250525

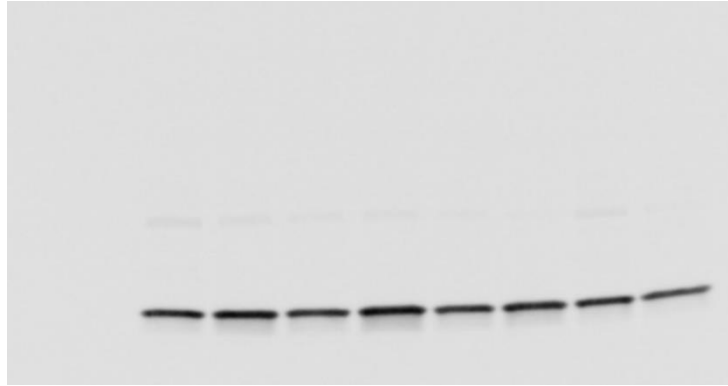

**Figure 3A**

A2780\_HEY\_HH23\_TykNu\_10mins\_H3K9me2\_20250525

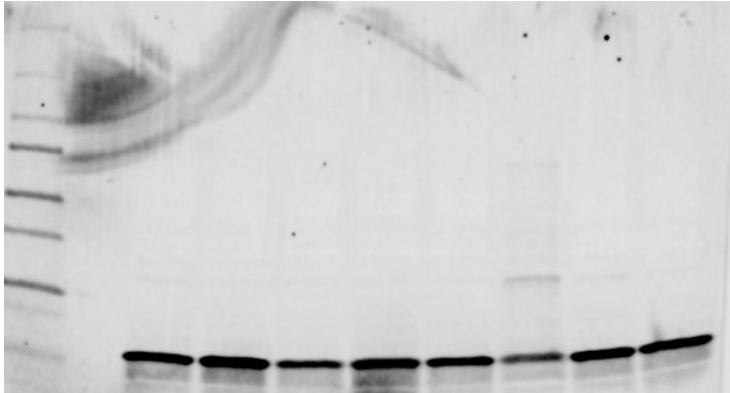

A2780\_HEY\_HH23\_TykNu\_10mins\_H3 and actin for\_H3K9me2\_20250525

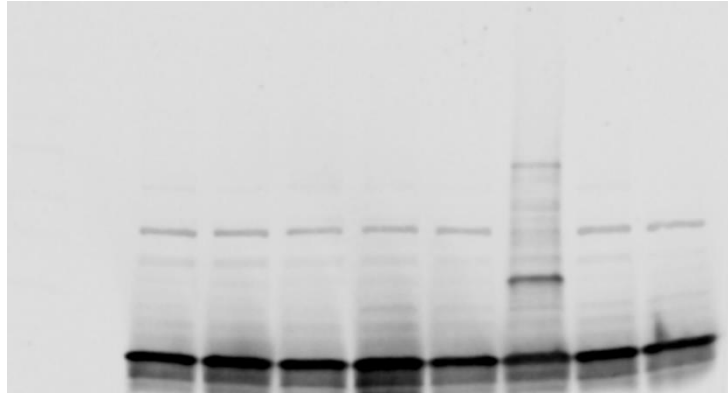

A2780\_HEY\_HH23\_TykNu\_10mins\_H3K9me3\_actin\_20250525

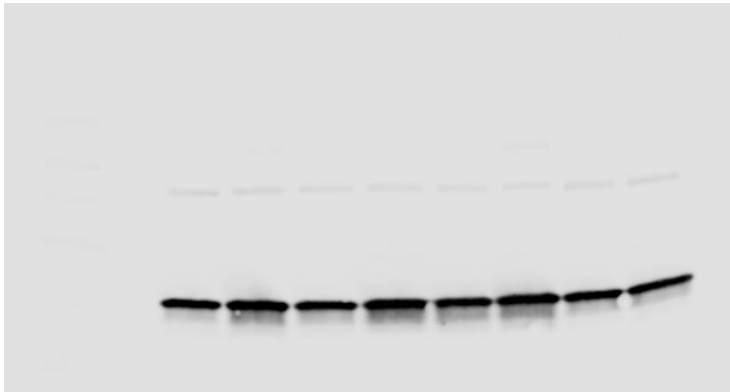

A2780\_HEY\_HH23\_TykNu\_10mins\_H3 for H3K9me3\_actin\_20250525

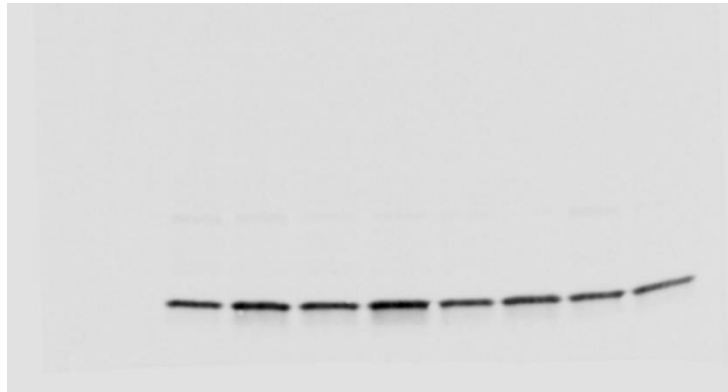

A2780\_HEY\_HH23\_TykNu\_6hrs\_H3K9ac\_actin\_20250525

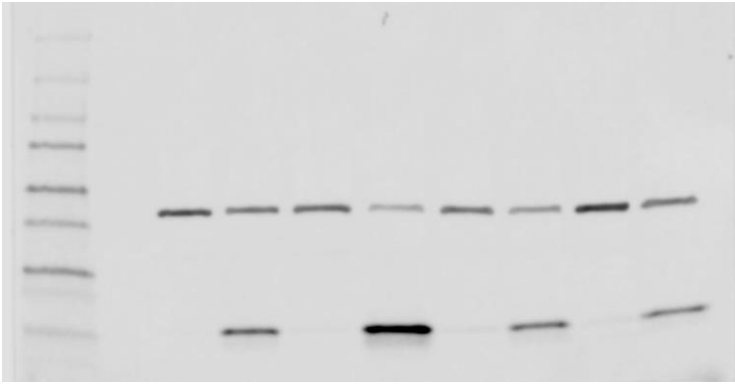

A2780\_HEY\_HH23\_TykNu\_6hrs\_H3 for H3K9ac\_actin\_20250525

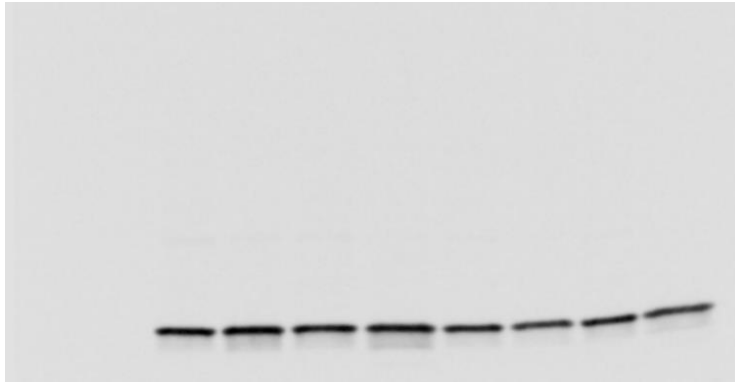

**Figure 3B**

A2780\_HEY\_HH23\_TykNu\_6hrs\_H3K9me2\_20250525

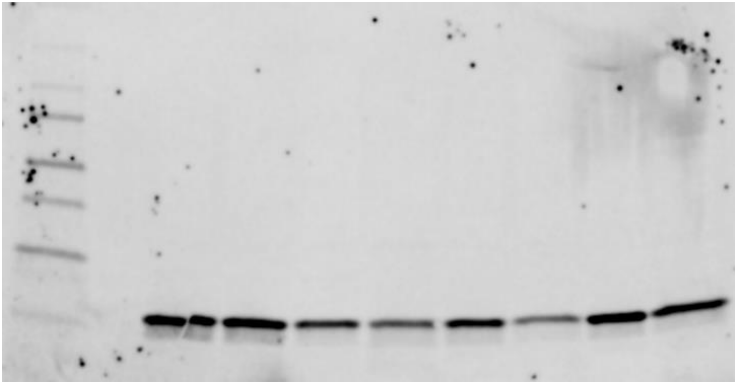

A2780\_HEY\_HH23\_TykNu\_6hrs\_H3 and actin for\_H3K9me2\_20250525

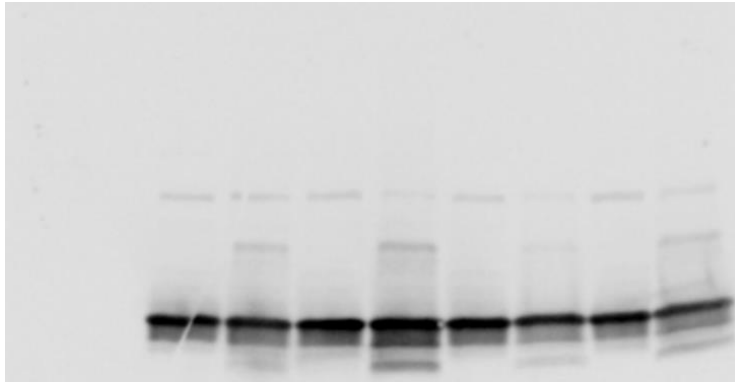

A2780\_HEY\_HH23\_TykNu\_6hrs\_H3K9me3\_actin\_20250525

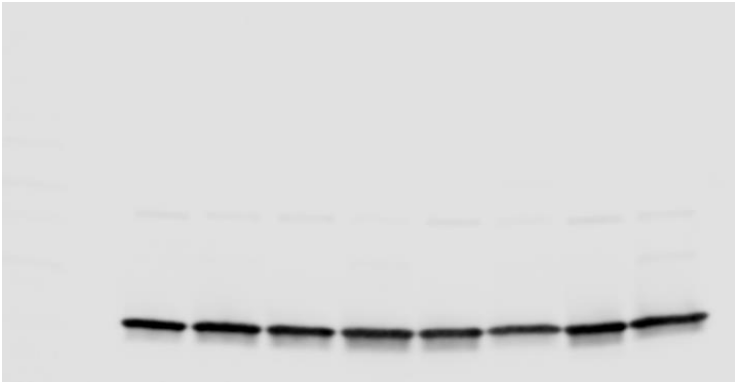

A2780\_HEY\_HH23\_TykNu\_6hrs\_H3 for H3K9me3\_actin\_20250525

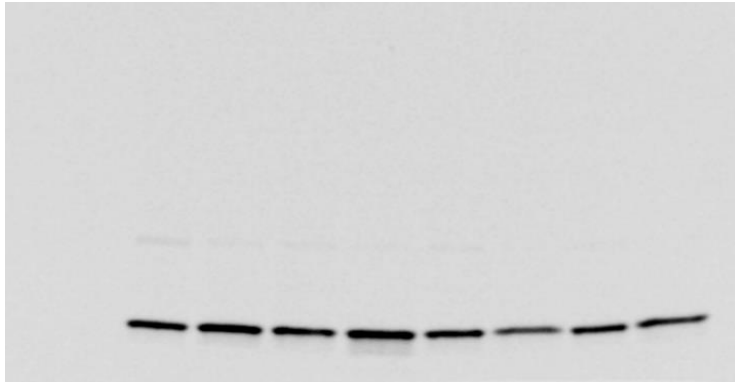

A2780\_HEY\_HH23\_TykNu\_10mins\_CBP/p300\_20250926

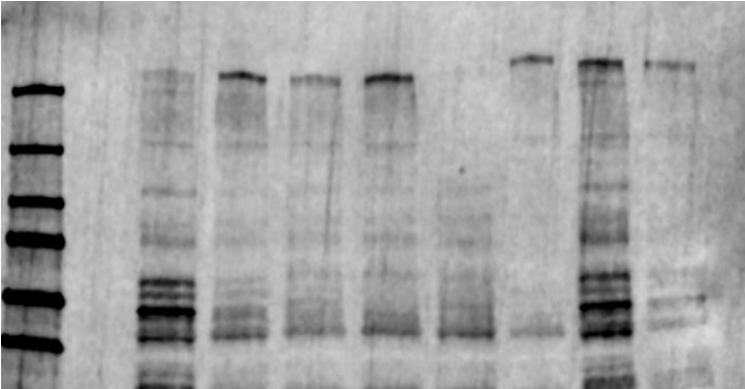

A2780\_HEY\_HH23\_TykNu\_10mins\_actin for CBP/p300\_20250926

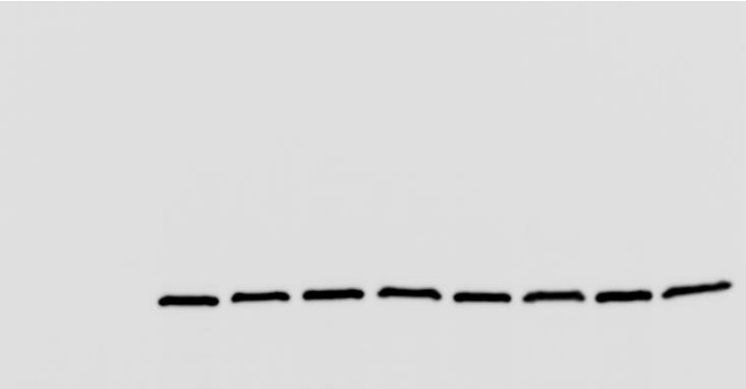

**Figure 3C**

A2780\_HEY\_HH23\_TykNu\_6hrs\_CBP/p300\_20251001

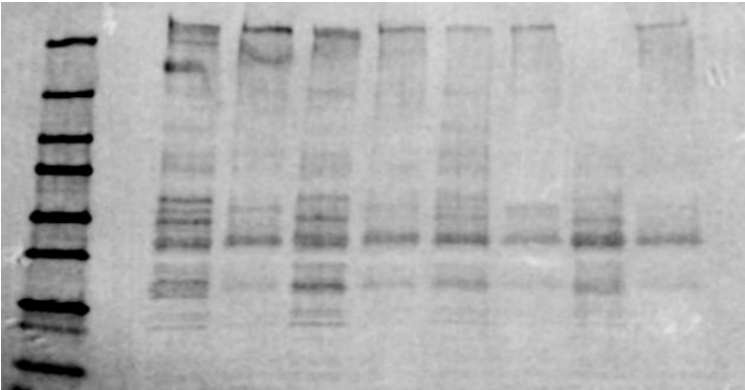

A2780\_HEY\_HH23\_TykNu\_6hrs\_actin forCBP/p300\_20251001

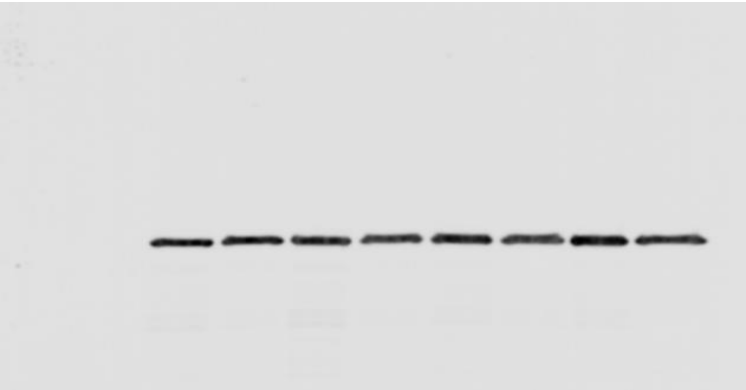

**Figure 3D**

A2780\_HEY\_HH23\_TykNu\_6hr\_Hsp70\_20250912

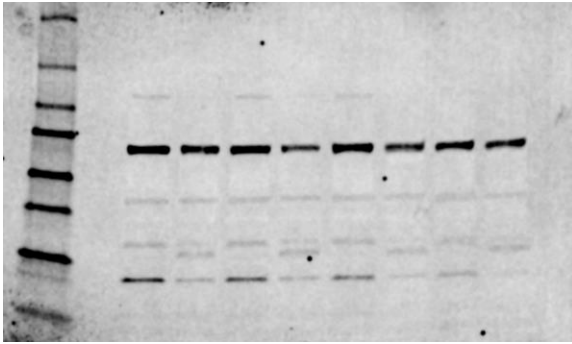

A2780\_HEY\_HH23\_TykNu\_6hr\_Actin\_for\_hsp70\_20250912

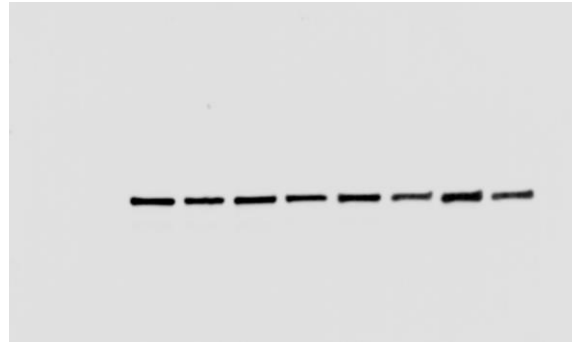

A2780\_HEY\_HH23\_TykNu\_6hr\_CALR\_20250912

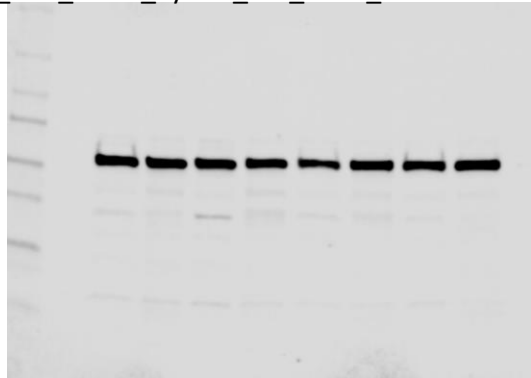

A2780\_HEY\_HH23\_TykNu\_6hr\_Actin\_for\_CALR\_20250912

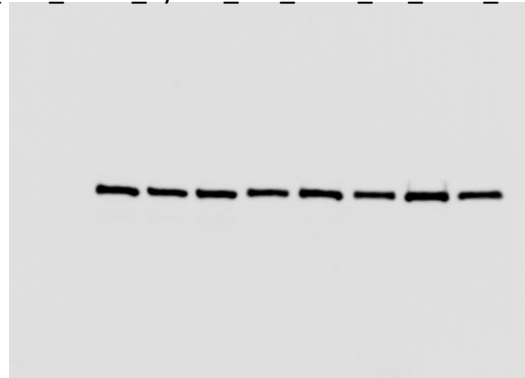

**Figure 5D**

A2780\_HEY\_HH23\_TykNu\_24hr\_Hsp70\_20251015

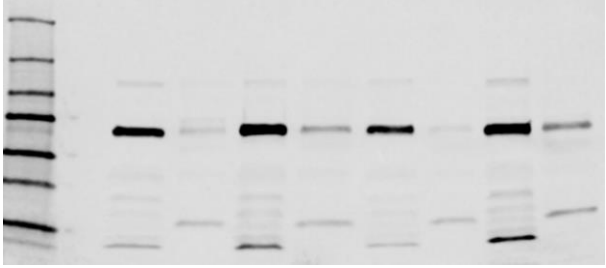

A2780\_HEY\_HH23\_TykNu\_24hr\_Actin\_for\_Hsp70\_20251015

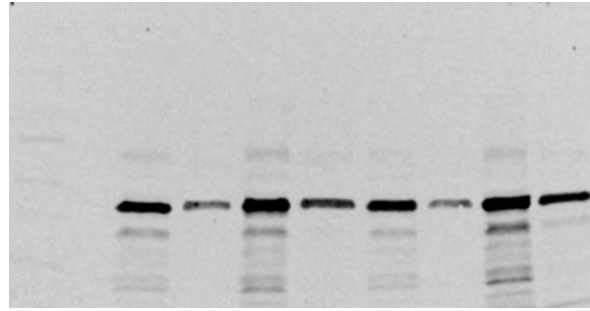

**Figure 5F**

A2780\_HEY\_HH23\_TykNu\_24hr\_CALR\_20251015

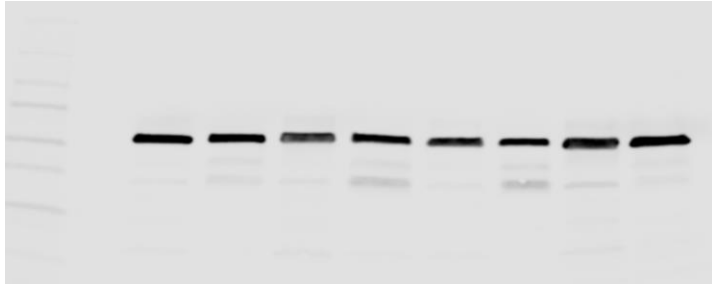

A2780\_HEY\_HH23\_TykNu\_24hr\_Actin\_for\_CALR\_20251015

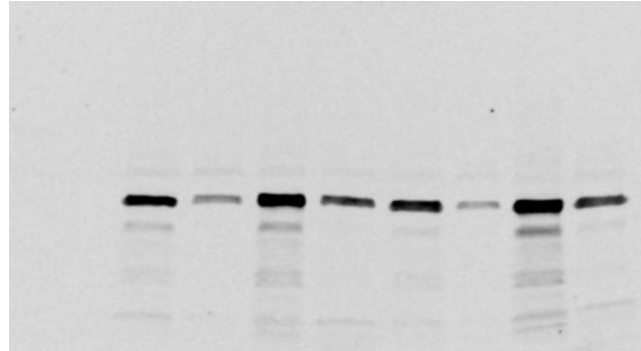

Supplement: Supplementary file 1 [file 7afc39eb971c16e4cd43e1bd.pdf]
